# Supplementary material for: SLAMF6/Ly108 promotes the development of hepatocellular carcinoma via facilitating macrophage M2 polarization
Source: PubMed Central journal article supplement — Oncol Lett. 2022 Jan 17;23(3):83. doi: 10.3892/ol.2022.13203 (PMC8805185; doi:10.3892/ol.2022.13203), 2022-01-17

Figure S1. Flow cytometry analysis was used to evaluate the percentage of SLAMF6<sup>+</sup>CD14<sup>+</sup> cells among monocytes isolated from healthy donors. The healthy donors were divided into two group according to age (20-40 and 41-60 groups). SLAMF6, signaling lymphocyte activation molecule family member 6.

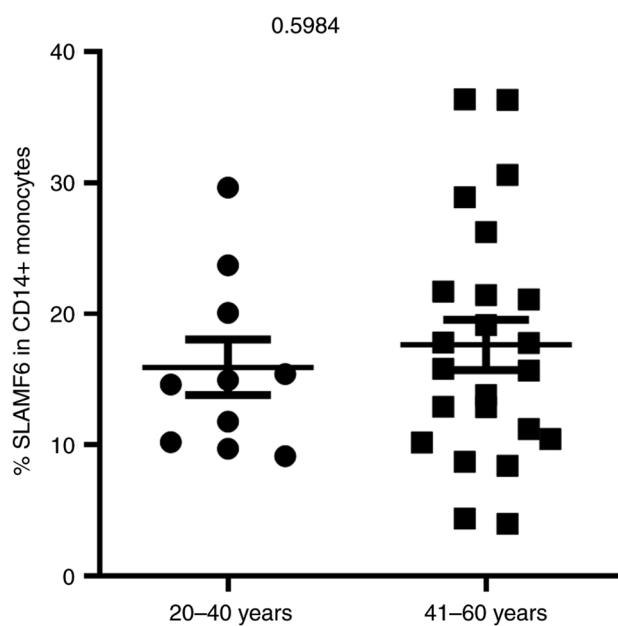

Supplement: Supplementary_Data.pdf [file Supplementary_Data.pdf]
